# Supplementary material for: Target-Specific Nanoparticle Polyplex Down-Regulates Mutant Kras to Prevent Pancreatic Carcinogenesis and Halt Tumor Progression
Source: MDPI journal article supplement (doi:10.3390/ijms24010752), 2023-01-01
Supplement: s1 [file s1]

## Supplementary Materials

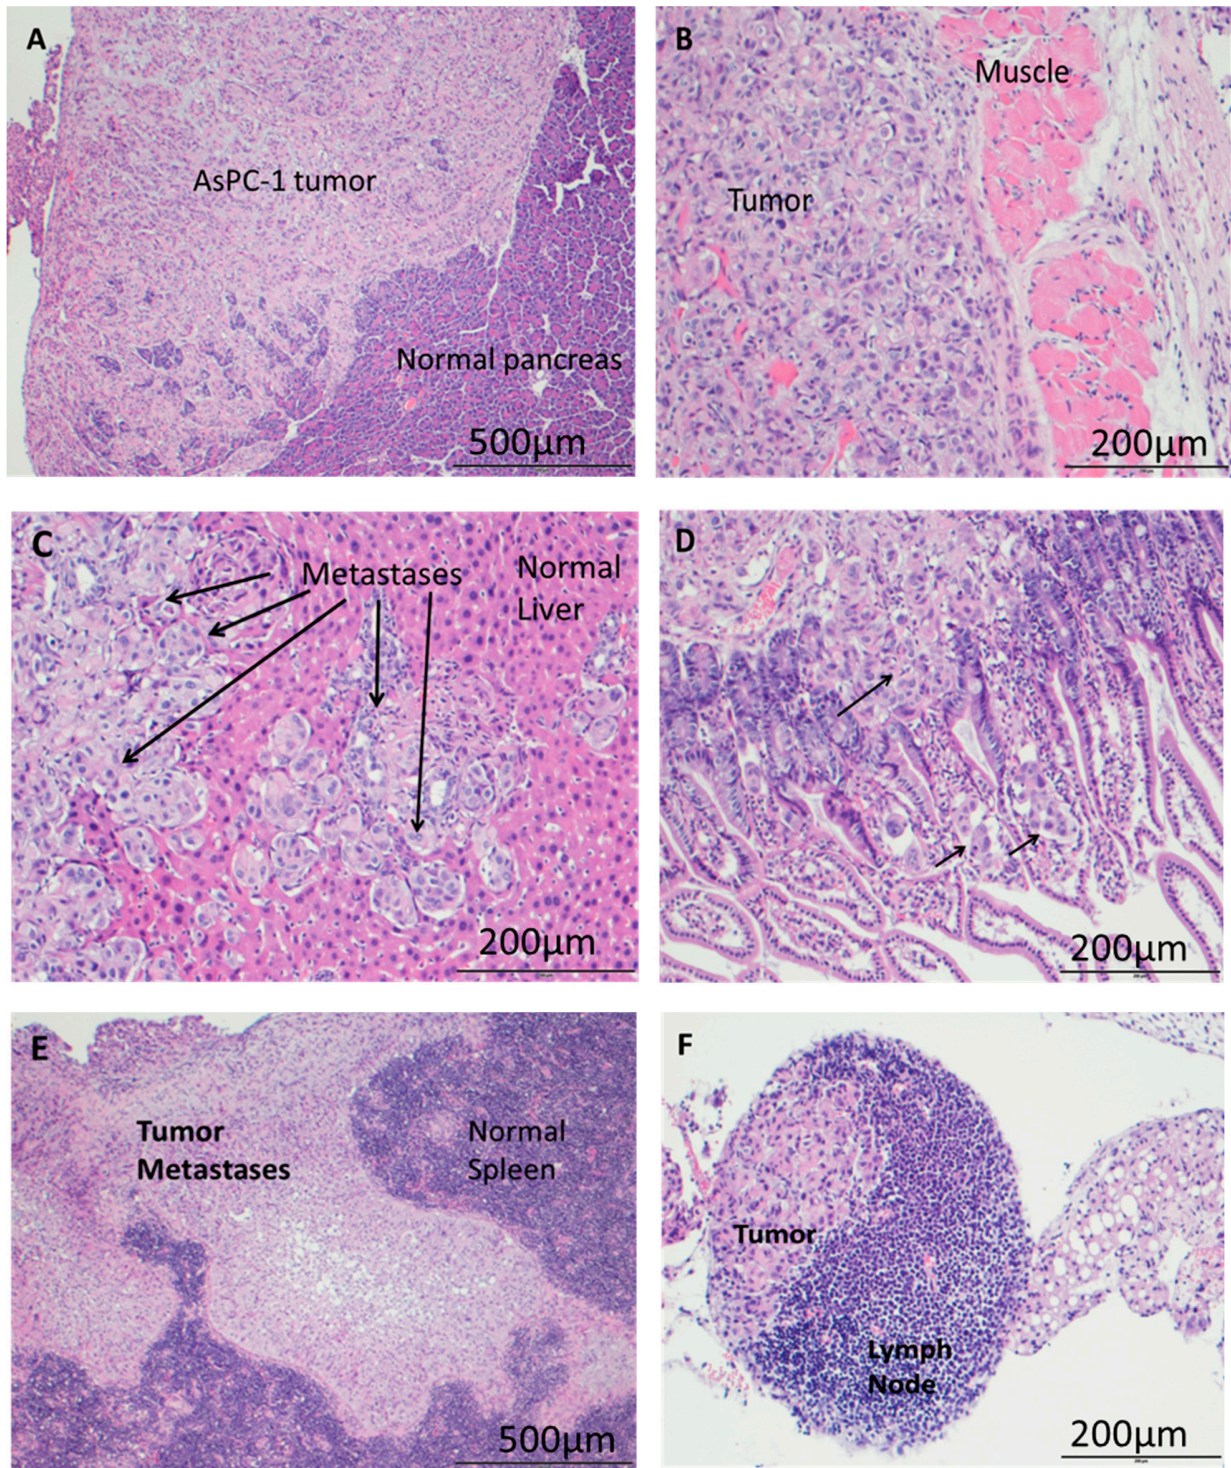

**Figure S1.** Confirmation of AsPC-1 tumor metastases by histology. (A) Primary AsPC-1 tumor in pancreas of scrambled siRNA NP-treated control mouse. (B) AsPC-1 tumor is shown metastasized to the abdominal wall in a *GAST* siRNA NP-treated mouse. (C) AsPC-1 tumor metastases confirmed in the liver

(arrows) of a mouse treated with *muKRAS* siRNA NPs. **(D)** AsPC-1 tumor metastases confirmed invading the stomach (arrows) of a mouse treated with *muKRAS* siRNA NPs. **(E)** Metastases of AsPC-1 tumor cells in the spleen of a scrambled siRNA NP treated mouse. **(F)** Lymph node invasion with the AsPC-1 tumor of a PBS-treated mouse.



## Intestine

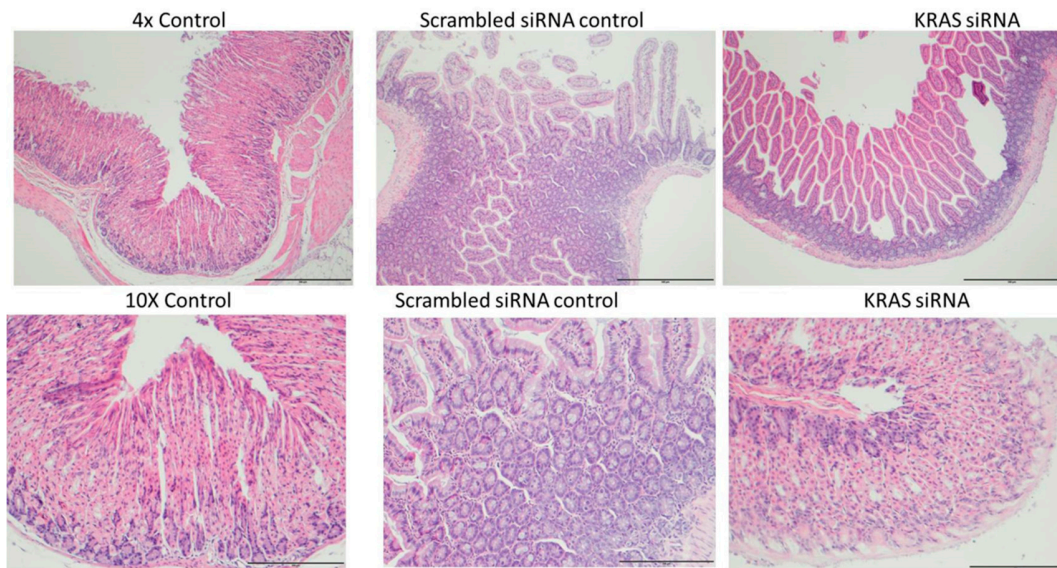

**Figure S2.** Mouse intestine. H&E imaged at low magnification (4X, top row; scale bar 500 μm) and higher magnification (10X, bottom row; scale bar 200 μm) if intestine sections from untreated (control), scrambled NP-treated, or *muKras* NP-treated revealed normal histology and no inflammation.

## Stomach

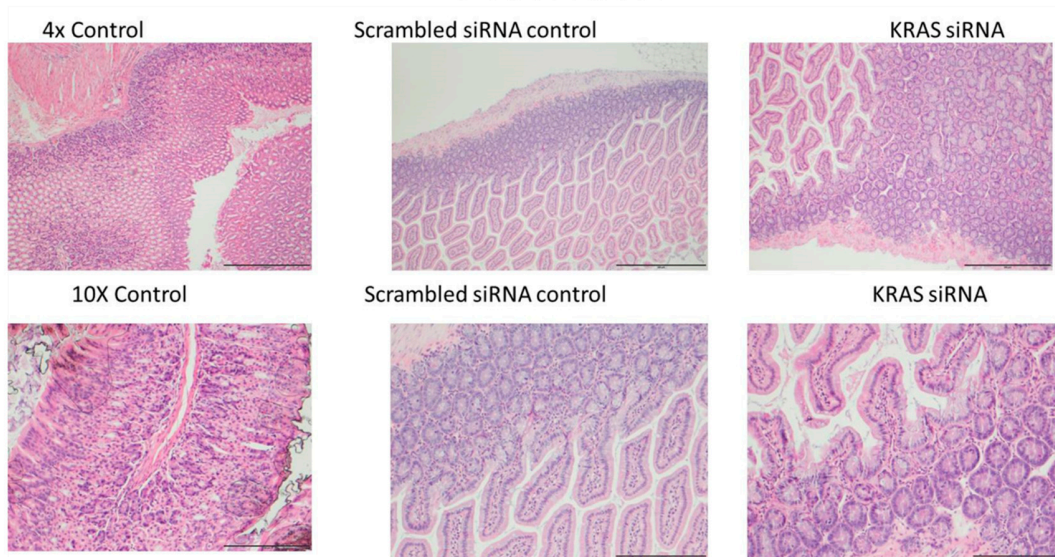

**Figure S3.** Mouse stomach. H&E imaged at low magnification (4X, top row; scale bar 500 μm) and higher magnification (10X, bottom row; scale bar 200 μm) of stomach sections from untreated (control), scrambled NP treated, or *muKras* NP-treated revealed normal histology and no inflammation.

## Liver

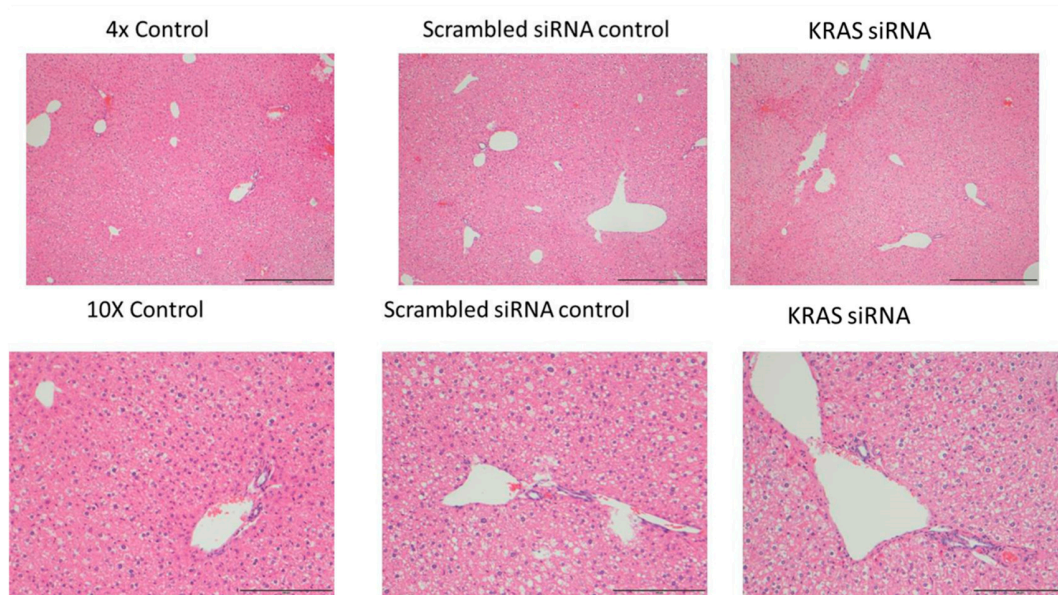

**Figure S4.** Mouse liver. H&E imaged at low magnification (4X, top row; scale bar 500 μm) and higher magnification (10X, bottom row; scale bar 200 μm) of liver sections from untreated (control), scrambled NP treated, or *muKras* NP-treated revealed normal histology and no inflammation.

## Kidney

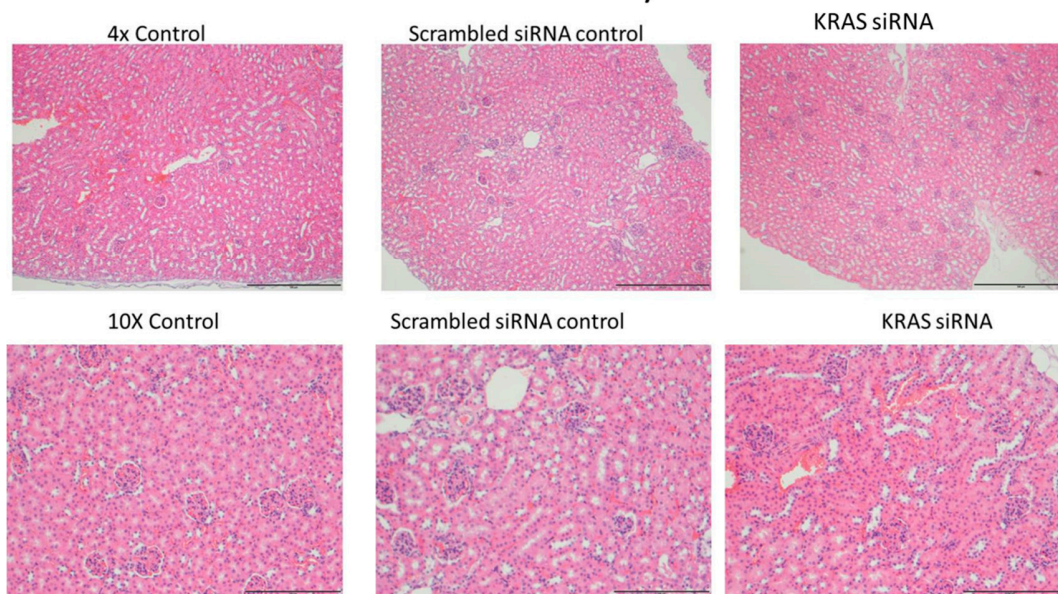

**Figure S5.** Mouse kidney. H&E imaged at low magnification (4X, top row; scale bar 500 μm) and higher magnification (10X, bottom row; scale bar 200 μm) of kidney sections from untreated (control), scrambled NP treated, or *muKras* NP-treated revealed normal histology and no inflammation.



# Spleen

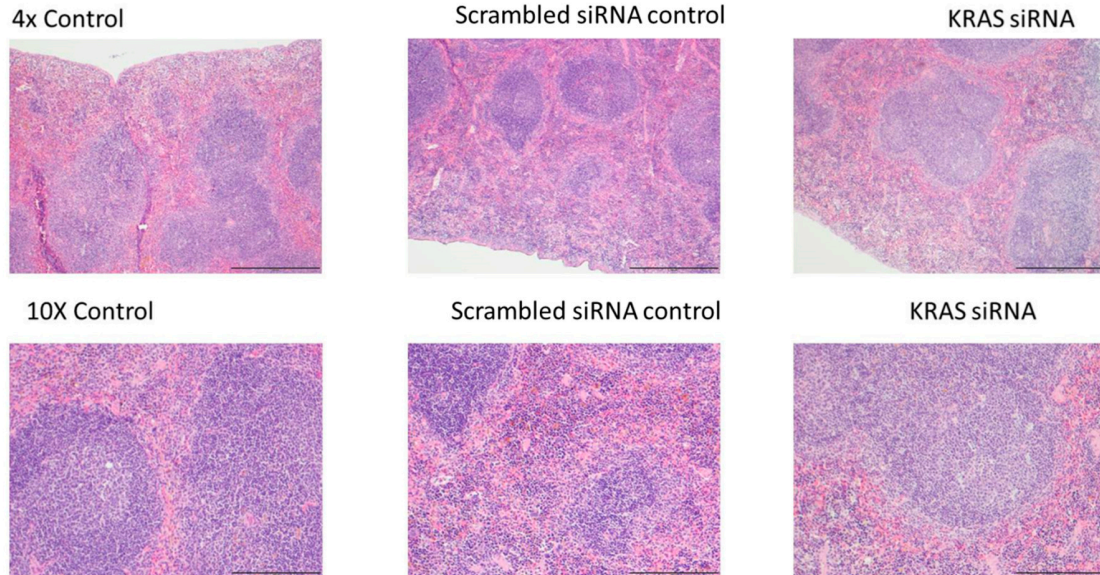

**Figure S6.** Mouse spleen. H&E imaged at low magnification (4X, top row; scale bar 500  $\mu$ m) and higher magnification (10X, bottom row; scale bar 200  $\mu$ m) of spleen sections from untreated (control), scrambled NP treated, or *muKras* NP-treated revealed normal histology and no inflammation.

Supplementary Table S1: Sequences of the siRNAs loaded to nanoparticles

| siRNA                                 | Sense 5' to 3'                 | Anti-sense 5' to 3'            | Molecular weight, g/mol |
|---------------------------------------|--------------------------------|--------------------------------|-------------------------|
| Wild type<br><i>Kras</i> *            | GUUGGAGCU <b>GG</b> UGGCGUAGTT | CUACGCC <b>ACC</b> AGCUCCAAGTT | 13,447.2                |
| Mutant, <i>Kras</i><br><i>/KRAS</i> * | GUUGGAGCU <b>GA</b> UGGCGUAGTT | CUACGCC <b>AUC</b> AGCUCCAAGTT | 13,348.2                |
| Scrambled<br>Control                  | CGAAGUGUGUGUGUGUGGCTT          | GCCACACACACACACUUCGTT          | 13,371.2                |
| Gastrin<br>( <i>GAST</i> )            | GUGCUGAGGAUGAGAACUA            | TAGTTCTCATCCTCAGC              | 11262.2                 |

\*Bold codon in the *Kras* sequence refers to the G12D mutation

Supplementary Table S2: Primers used for qRT-PCR.

| Primer name          | Forward 5'-3'              | Reverse 5—3'            |
|----------------------|----------------------------|-------------------------|
| Mouse Mutant Kras*   | <b>GAT</b> GGCGTAGGCAAGAGC | GCACGCAGACTGTAGAGCAG    |
| Mouse Wild-type Kras | TGGTGGCGTAGGCAAGAG         | GCAGACTGTAGAGCAGCGTTA   |
| Mouse Wild-type Kras | TTGGAGCTGGTGGCGTAG         | TAGAGCAGCGTTACCTCTATCG  |
| Mouse HPRT           | TCAGTCAACGGGGGACATAAA      | GGGGCTGTACTGCTTAACCAG   |
| Human Mutant KRAS    | CTTGTGGTAGTTGGAGCTGATG     | TGTTGGATCATATTCGTCCACAA |
| Human Wild-type KRAS | TGTGGTAGTTGGAGCTGGT        | ATTGTTGGATCATATTCGTCCAC |
| Human gastrin        | GCCTCTCATCATCGAAGGCA       | GCCGAAGTCCATCCATCCAT    |
| Human GAPDH          | GTCTCCTCTGACTTCAACAGCG     | ACCACCCTCTTGCTGTAGCCAA  |

\*Bold codon for primer is able to differentiate wild type from mutant Kras
